# Supplementary material
Source: publisher figshare collection journal article supplement (https://acs.figshare.com/ndownloader/files/7590775)
Supplement: Supplementary file 1 [file 7590775]

## Supplemental Information:

### Intein-promoted cyclization of aspartic acid flanking the intein leads to atypical N-terminal cleavage

Christopher J. Minter<sup>1</sup>, Nicolle M. Siegart<sup>1</sup>, Kathryn M. Colelli<sup>1</sup>, Xinyue Liu<sup>2,3</sup>, Robert J. Linhardt<sup>2,3</sup>, Chunyu Wang<sup>2,4</sup>, Alvin V. Gomez<sup>1</sup>, Julie N. Reitter<sup>1</sup>, Kenneth V. Mills<sup>1\*</sup>

<sup>1</sup> College of the Holy Cross, Department of Chemistry, Worcester, MA 01610

<sup>2</sup>Department of Chemistry and Chemical Biology, <sup>3</sup>Department of Chemical and Biological Engineering, <sup>4</sup>Department of Biological Sciences and Center for Biotechnology and Interdisciplinary Studies, Rensselaer Polytechnic Institute, Troy, New York 12180

**Figure S1. LC-ESI-MS of precursor and cleavage fragments from N-terminal cleavage of MIHPab.** Mass spectra and the deconvolution results of **A.**) uncleaved MIHPab cleavage mutant precursor, **B.**) N-terminal cleavage fragment, and **C.**) C-terminal cleavage fragment. MIHPab cleavage mutant was reacted for 50°C for 16 h at pH 5 and analyzed LC-ESI-MS as described in the *Materials and Methods*.

**Figure S2. pH and temperature dependence of *Pab* PolII intein probed by NMR.** **A.** <sup>15</sup>N-<sup>1</sup>H HSQC at pH 4 (blue), 7 (red) and 10 (purple), showing comparable dispersion at each pH. This shows sample stability over a wide range of pH, which is necessary for NMR pK<sub>a</sub> determination. **B.** Temperature dependence of the HSQC from 300 K to 330 K. The HSQC pattern remains essentially the same with increasing temperature, indicating the absence of major conformational change induced by temperature.

**Figure S3. LC-ESI-MS of N-terminal fragment from N-terminal cleavage of NIHPab.** NIHPab cleavage mutant was reacted at 50°C for 16 h at pH 5, with or without 3 mM aniline or 250 mM hydroxylamine, as indicated. **A.** Samples were separated by a C18 column (total ion chromatograms shown), and analyzed by ESI-MS for NIHPab remaining precursor (**B**) or cleavage product (**C**) after incubation without added nucleophile; NIHPab remaining precursor (**D**) or cleavage product (**E**) after incubation with aniline; and NIHPab remaining precursor (**F**) or cleavage product (**G**) after incubation with hydroxylamine.

**Figure S4. LC-ESI-MS of C-terminal fragment from N-terminal cleavage of NIHPab.** NIHPab cleavage mutant was reacted at 50°C for 16 h at pH 5, with or without 3 mM aniline or 250 mM hydroxylamine, as indicated. Samples were separated by a C18 column (extracted ion chromatograms shown) and analyzed by ESI-FT-MS for the C-terminal product of cleavage after incubation without added nucleophile (**A**), with aniline (**B**), or with hydroxylamine (**C**).

**Figure S5. Time dependence of N-terminal cleavage of NIHPab.** NIHPab was incubated at 60°C for the times indicated in buffer C5 as described in the *Materials and Methods*. In B, aniline was added to 3 mM, and in C, hydroxylamine was added to 50 mM, with the pH adjusted as needed to 5.0. We analyzed the cleavage via SDS-PAGE and estimated the relative concentration via densitometry using ImageJ<sup>1</sup>. We fit the data to a first order rate law using Kaleidagraph.

**Table S1. Oligonucleotides used in mutagenesis reactions.**

**Table S2. Observed  $m/z$  values for the C-terminal cleavage products of the NIHPab cleavage mutant.**

Figure S1A

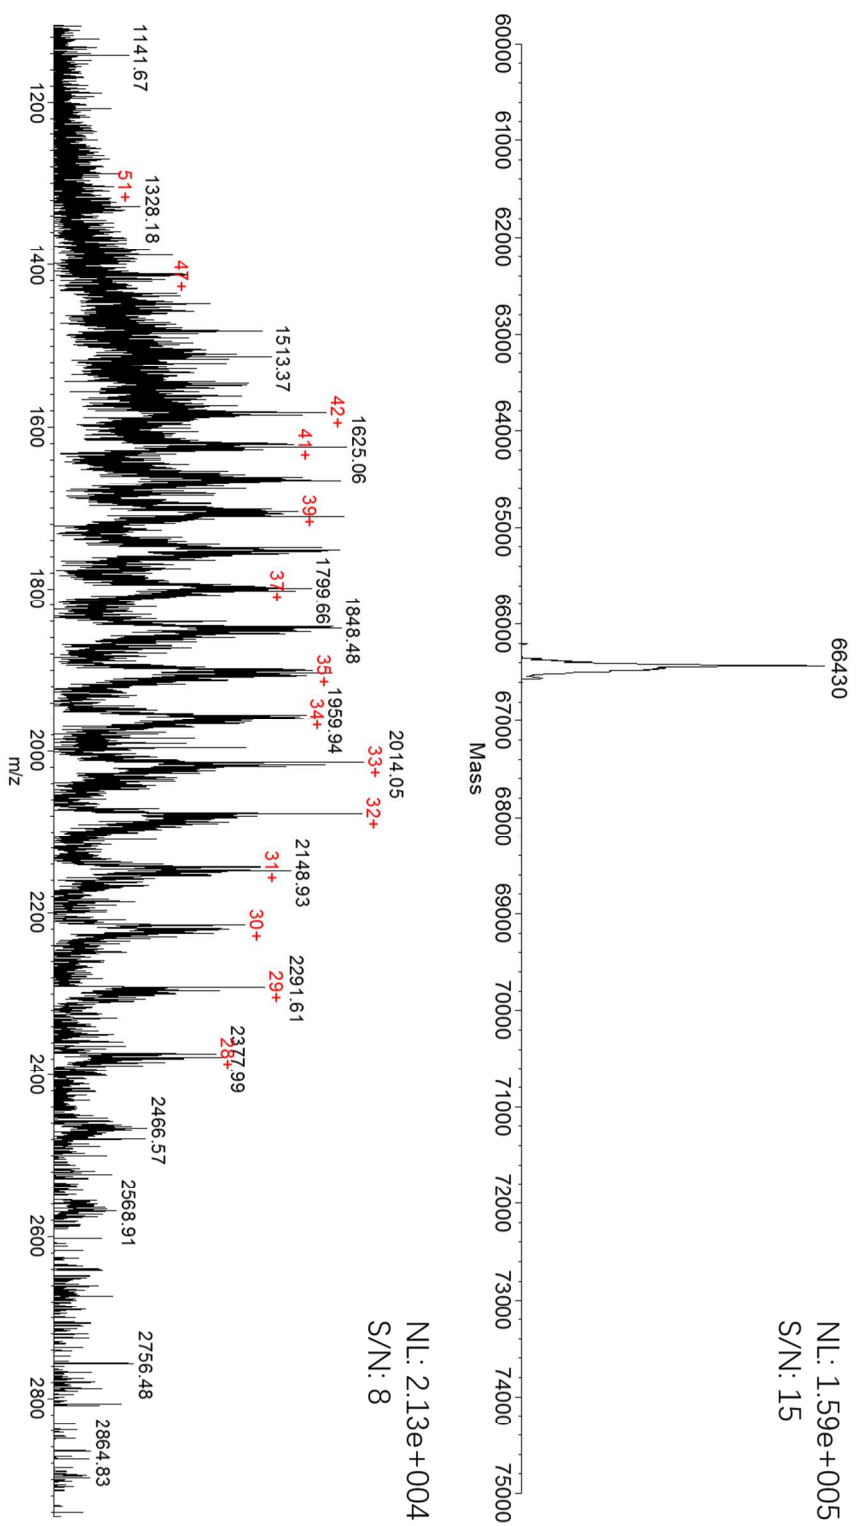

Figure S1B

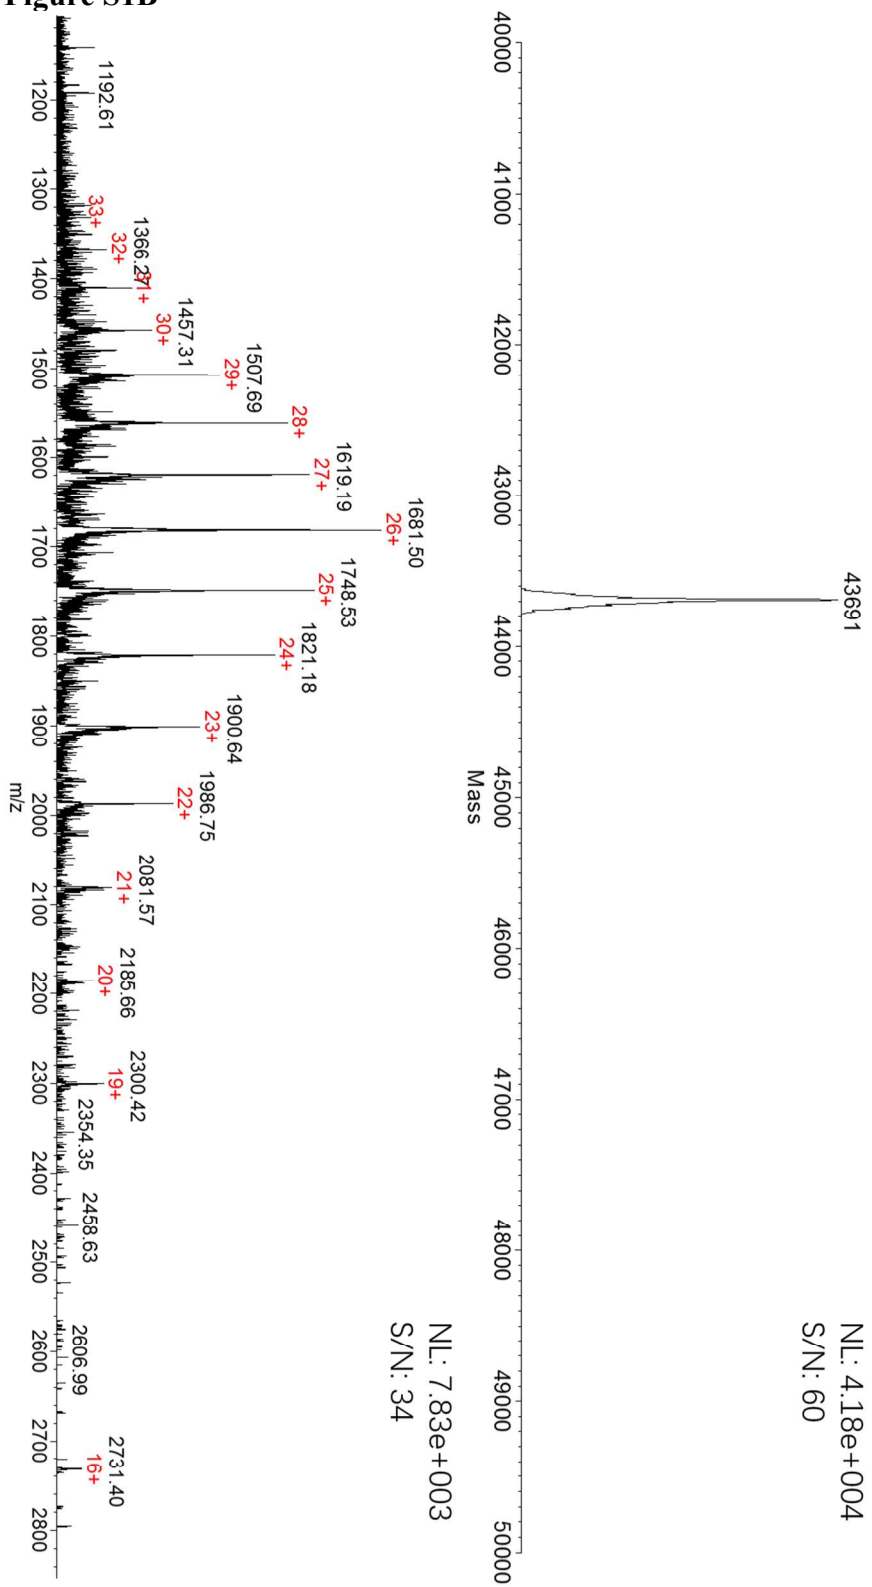

Figure S1C

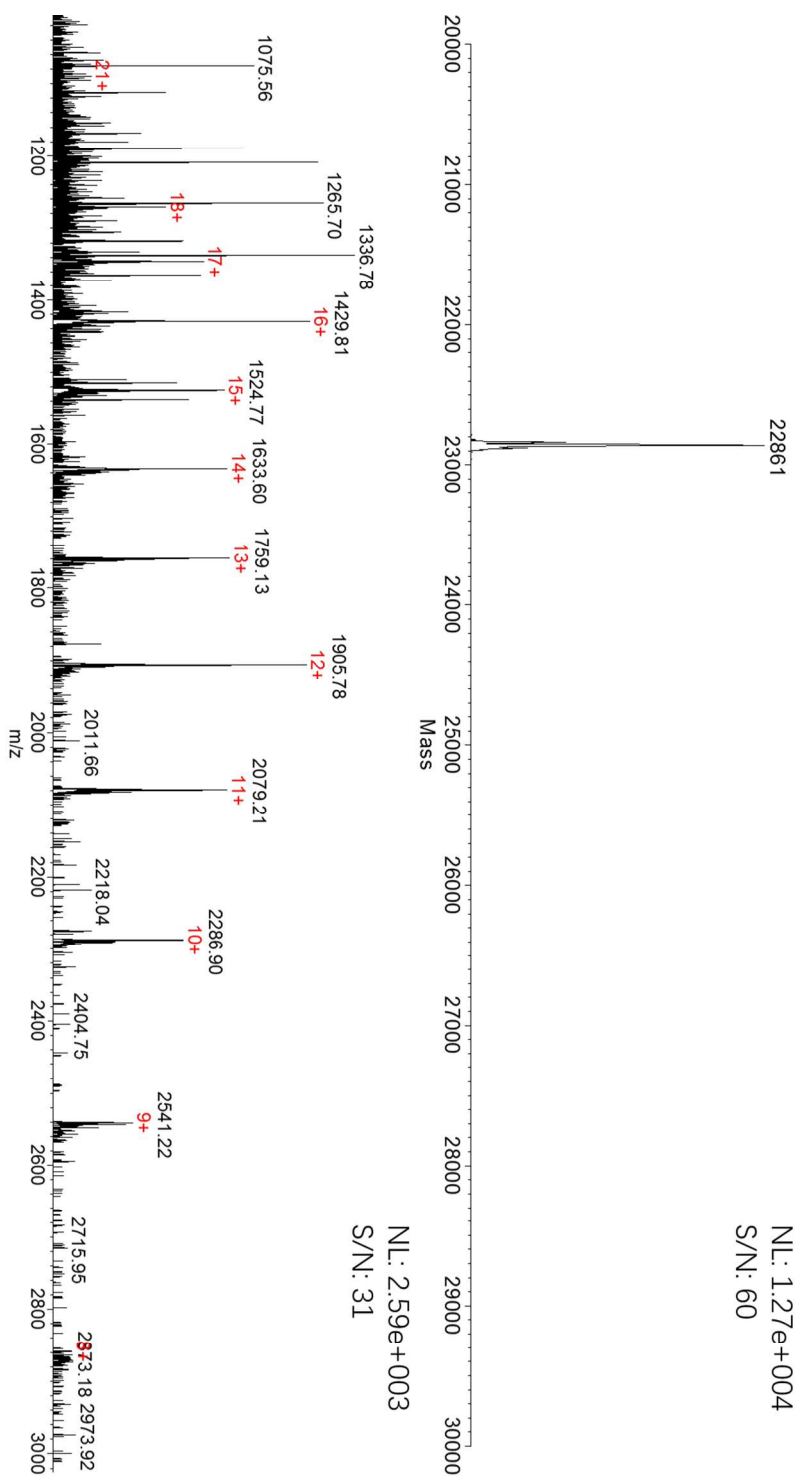

**Figure S2A.**

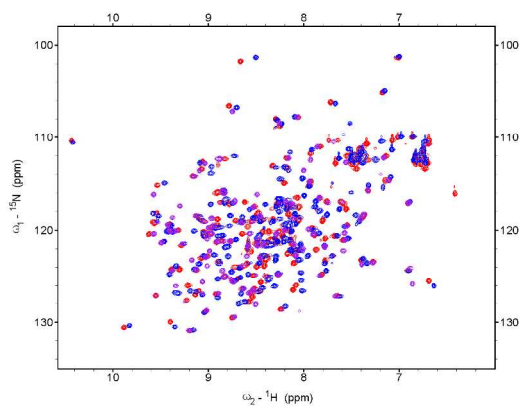

**Figure S2B.**

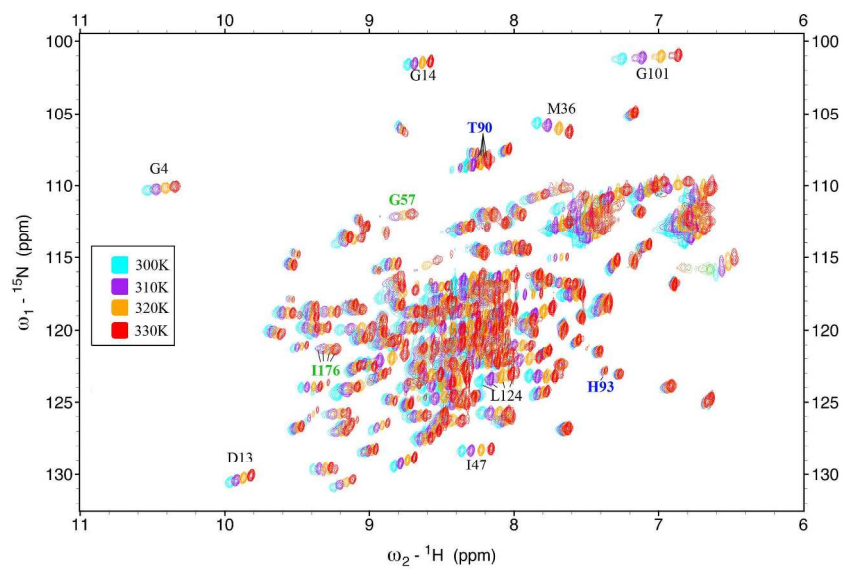

Figure S3A.

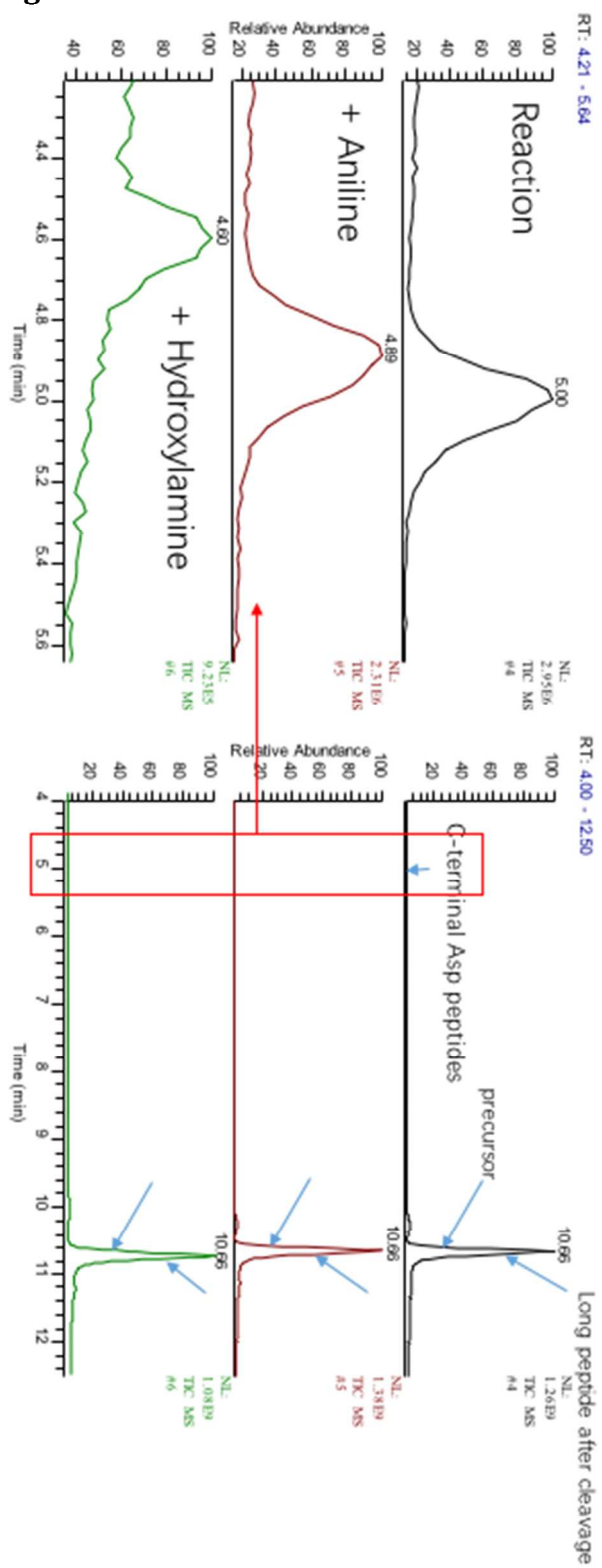

NL: 2.02e+006 S/N: 45

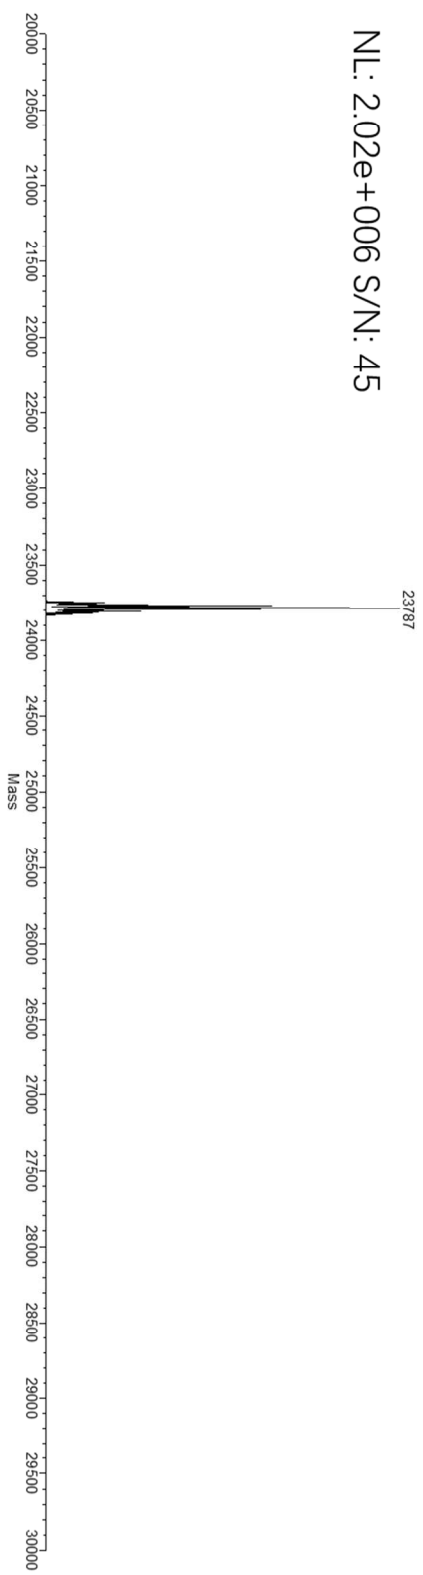

NL: 3.68e+005 S/N: 26

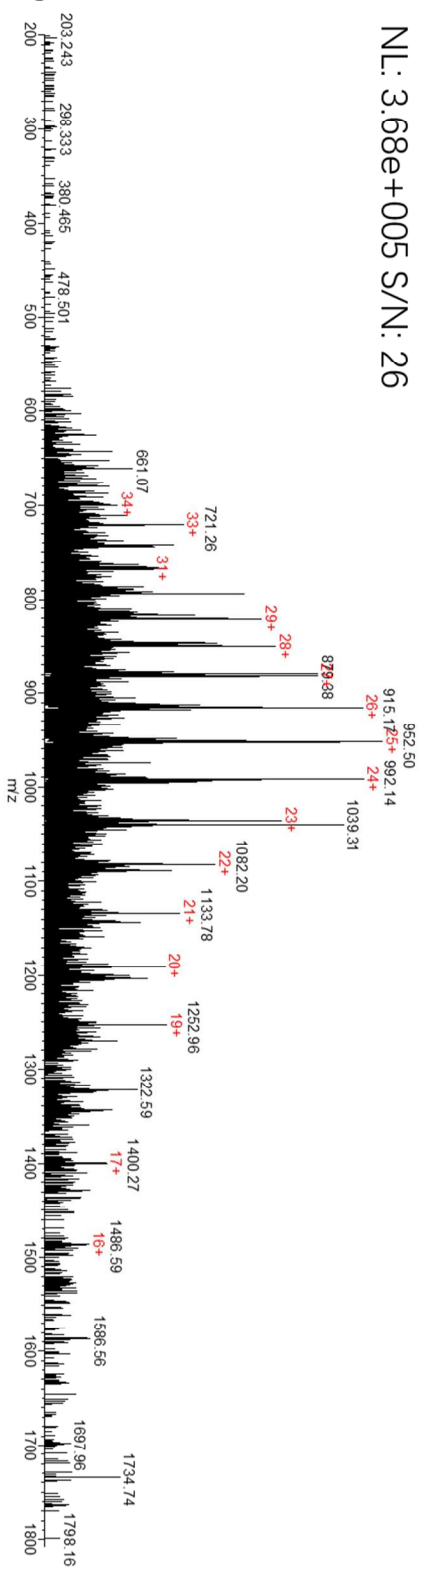

Figure S3B.



NL: 2.13e+006 S/N: 54

Mass spectrum plot showing relative intensity versus m/z. The x-axis ranges from 200 to 1800 m/z. The y-axis represents relative intensity. Numerous peaks are labeled with their m/z values and charge states. Key peaks include 880.23 (26+), 953.58 (23+), 994.78 (23+), 1039.91 (22+), 1089.52 (21+), 1143.90 (20+), 1270.94 (18+), 1344.81 (17+), 1430.00 (16+), 1580.21, 1670.55, 1750.15, and 1800.00.

Figure S3D.

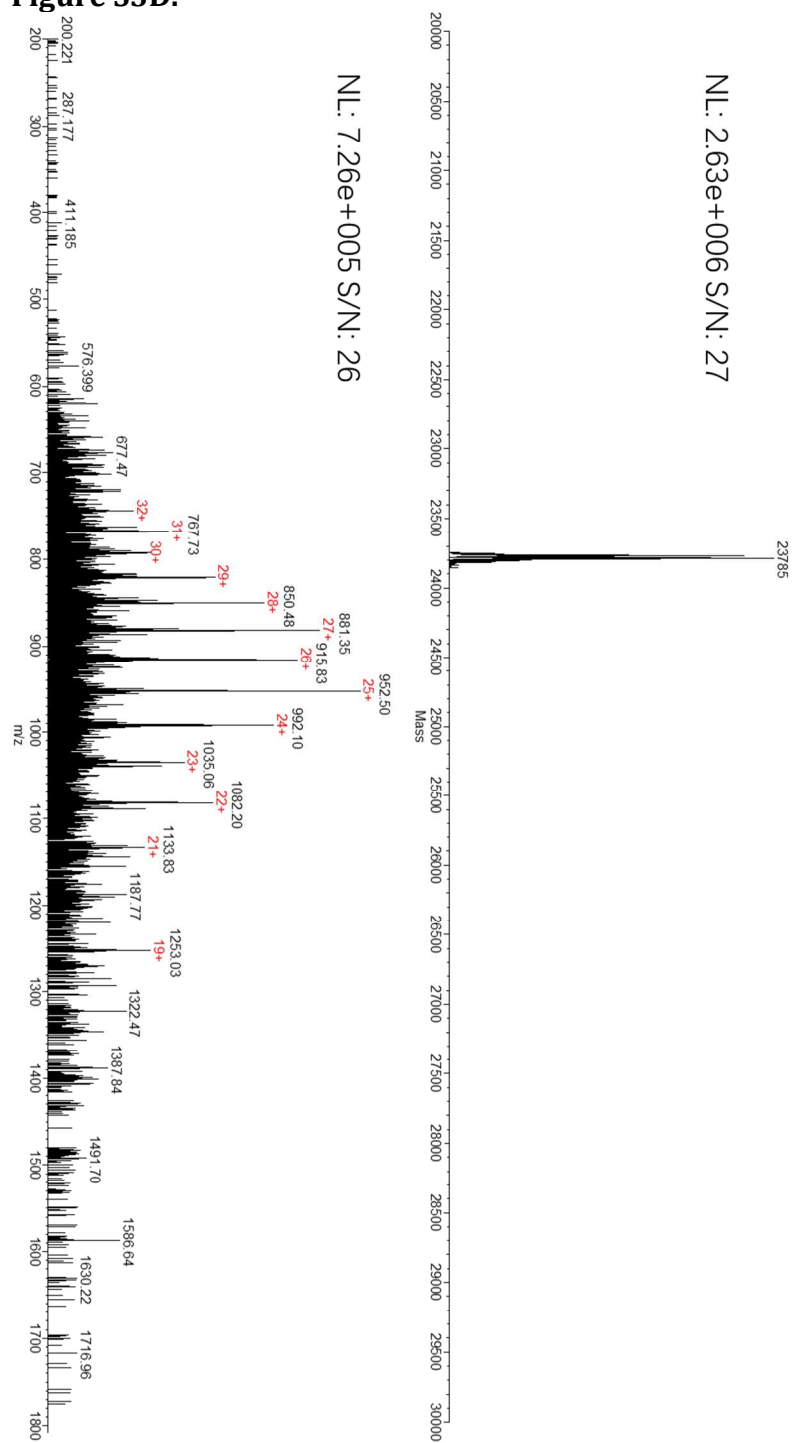

Figure S3E.

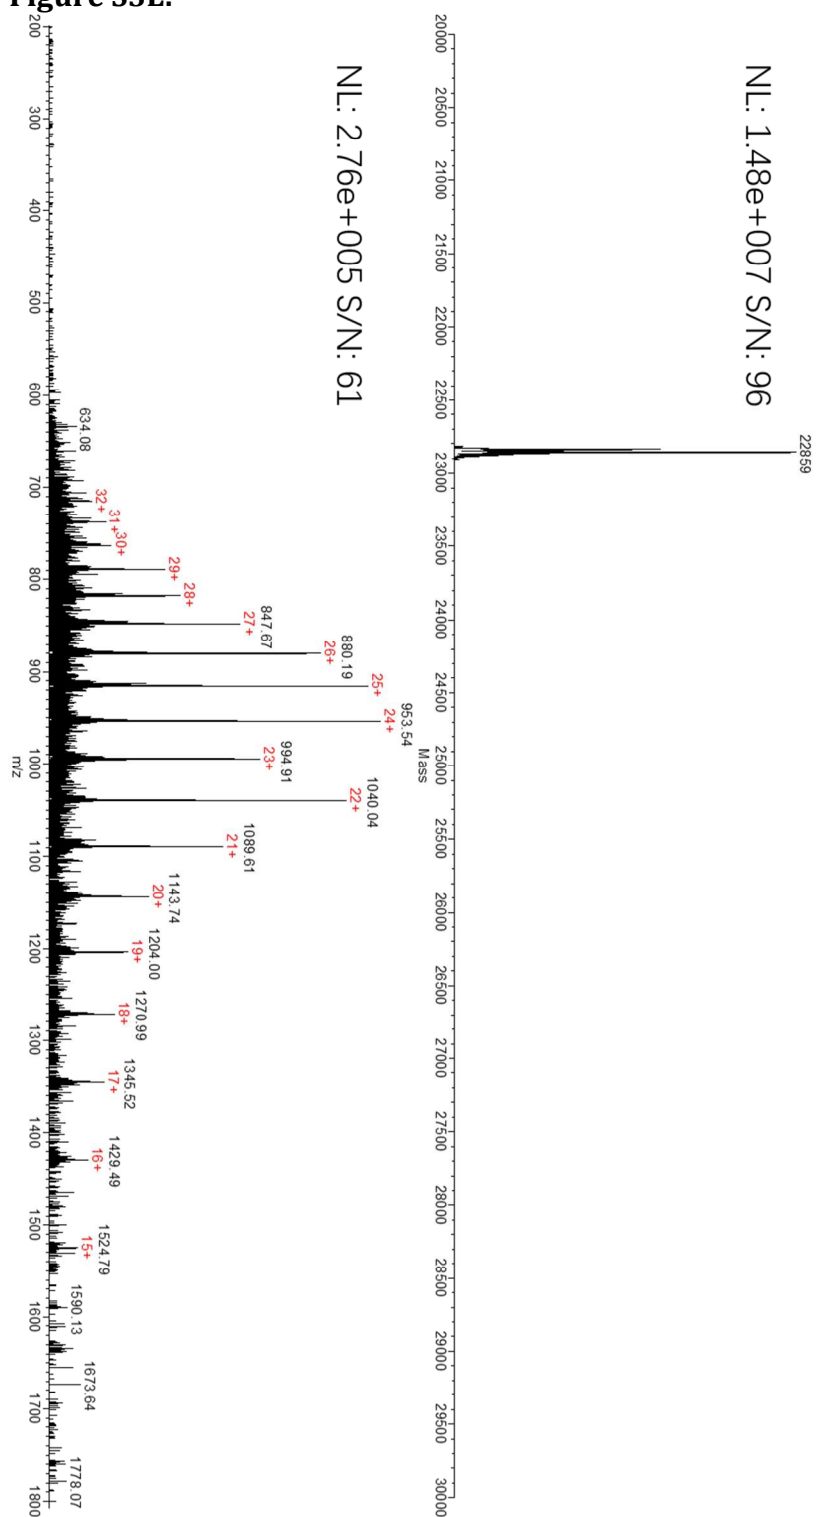

Figure S3F.

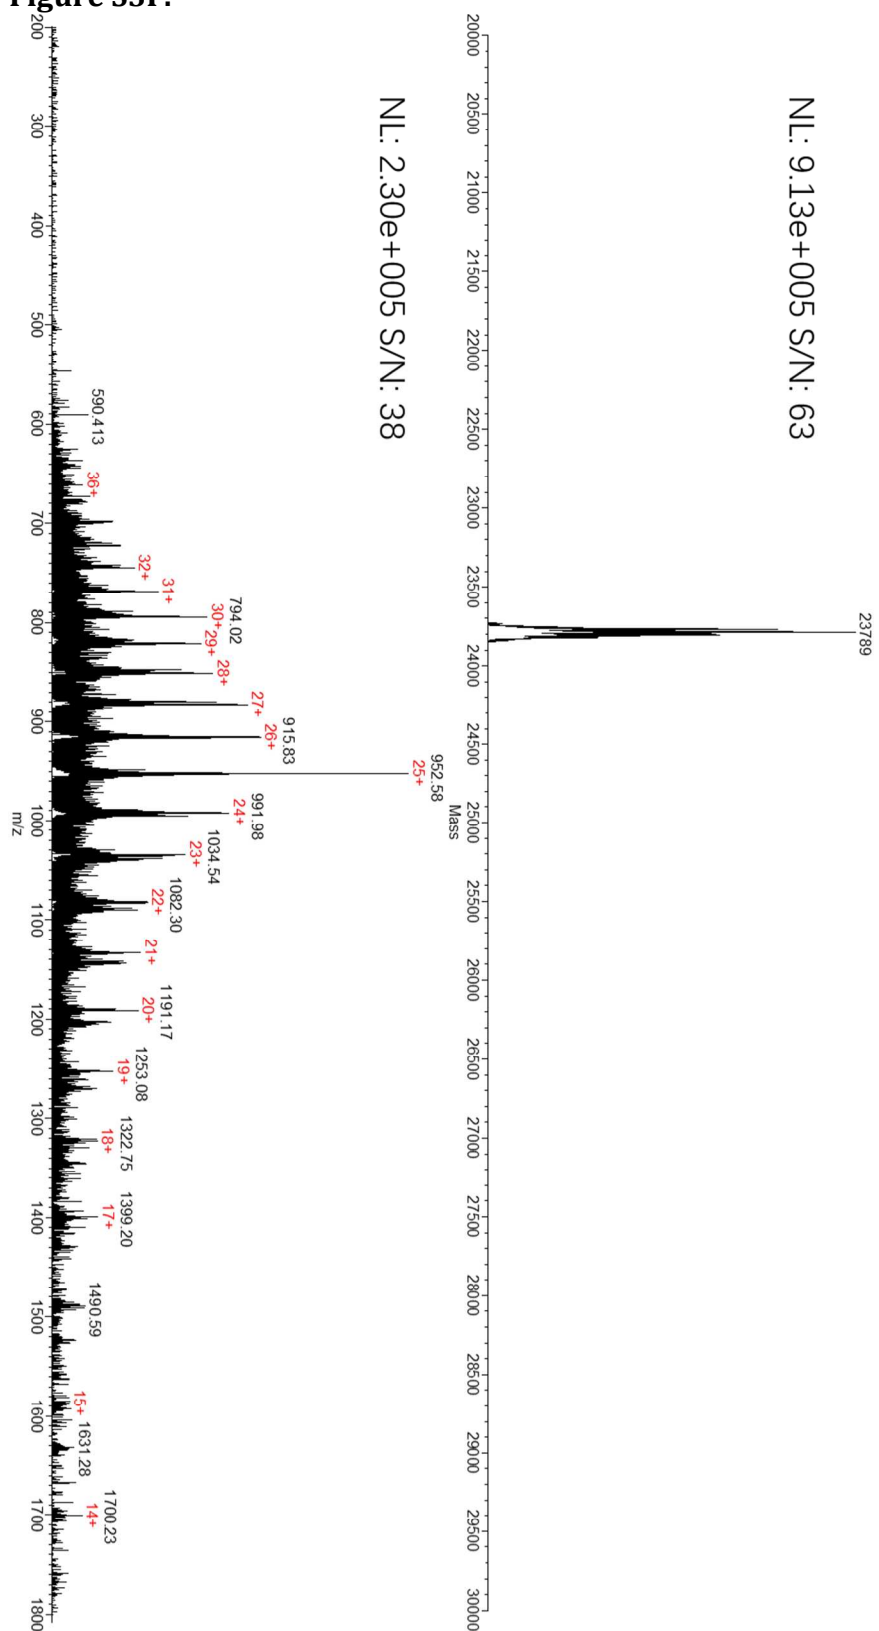

Figure S3G.

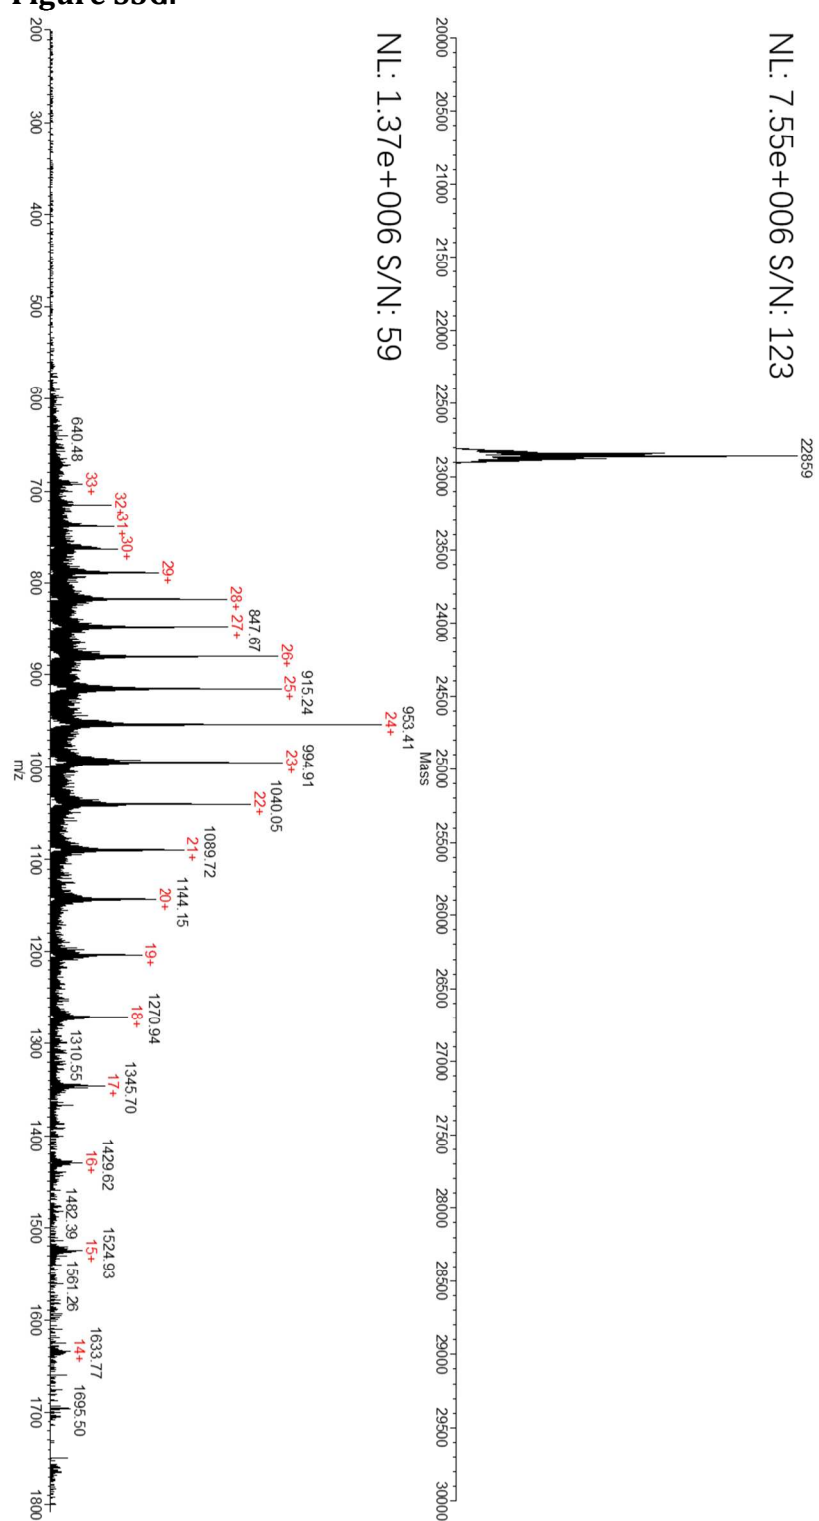

Figure S4A.

Extracted Ion Chromatography (EIC)

RT: 2.21 - 15.06

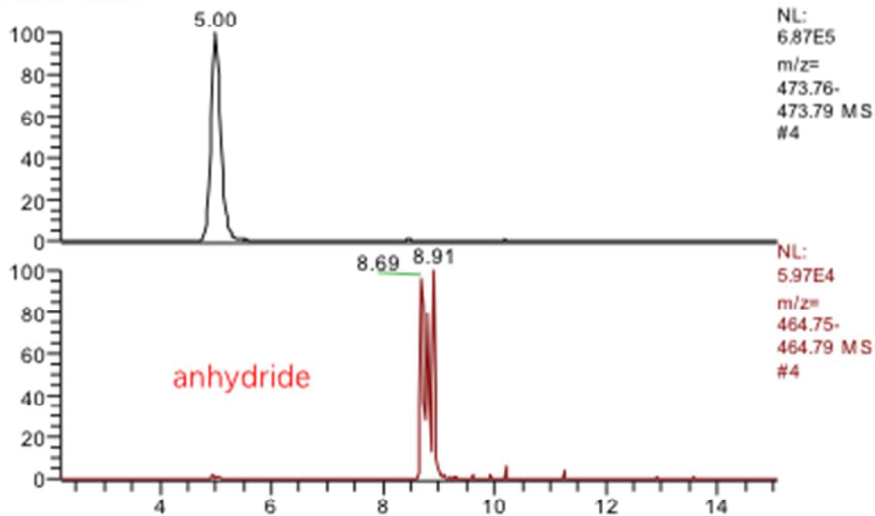

Mass Spectra (MS)

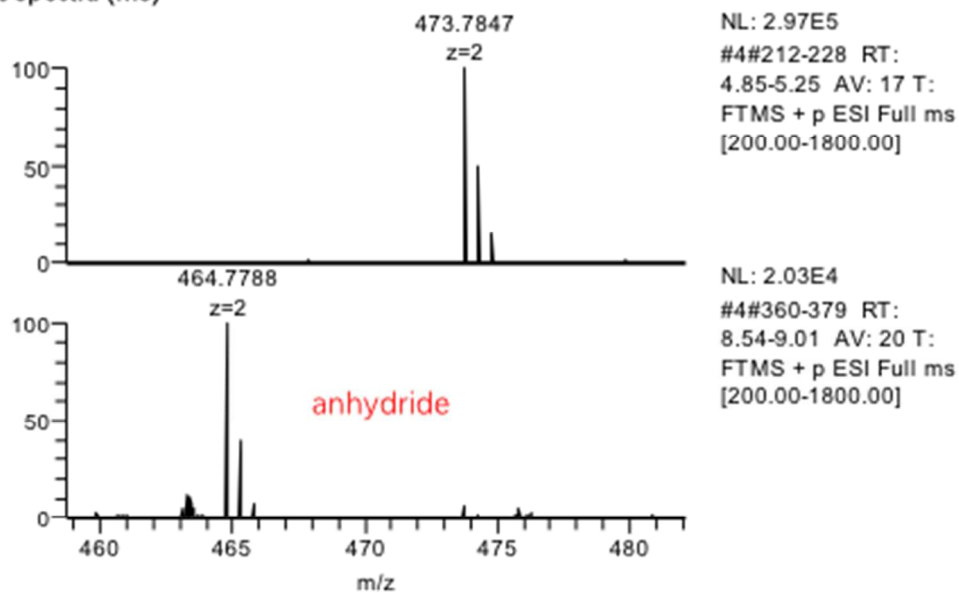

Figure S4B.

# Extracted Ion Chromatography (EIC)

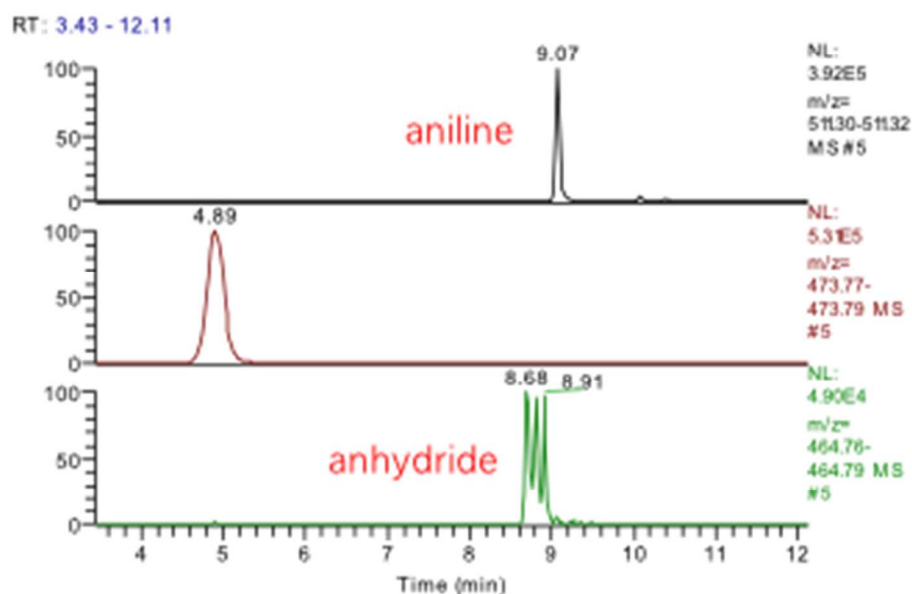

## Mass Spectra (MS)

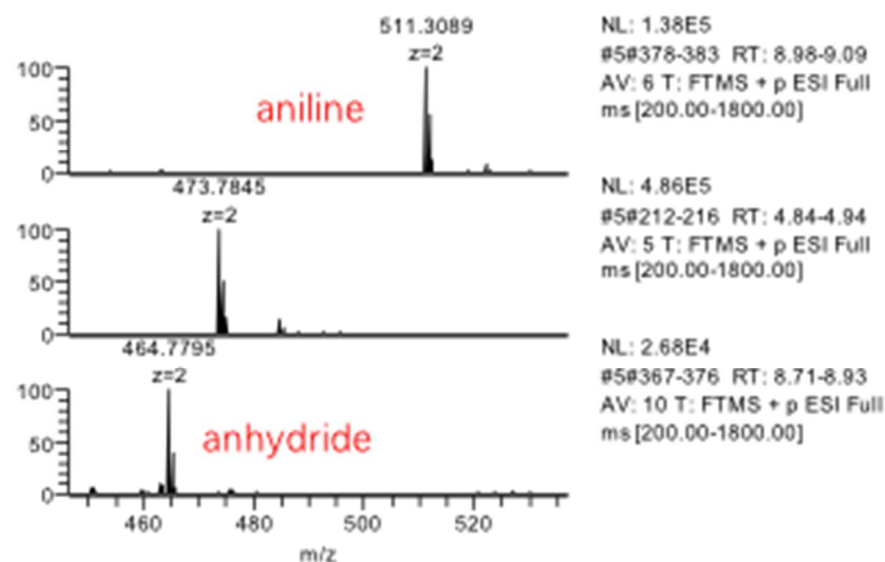

Figure S4C.

Extracted Ion Chromatography (EIC)

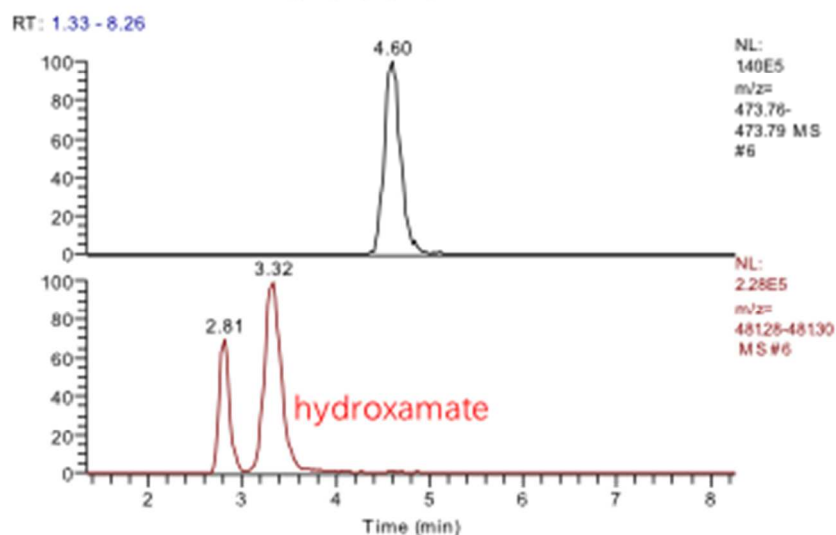

Mass Spectra (MS)

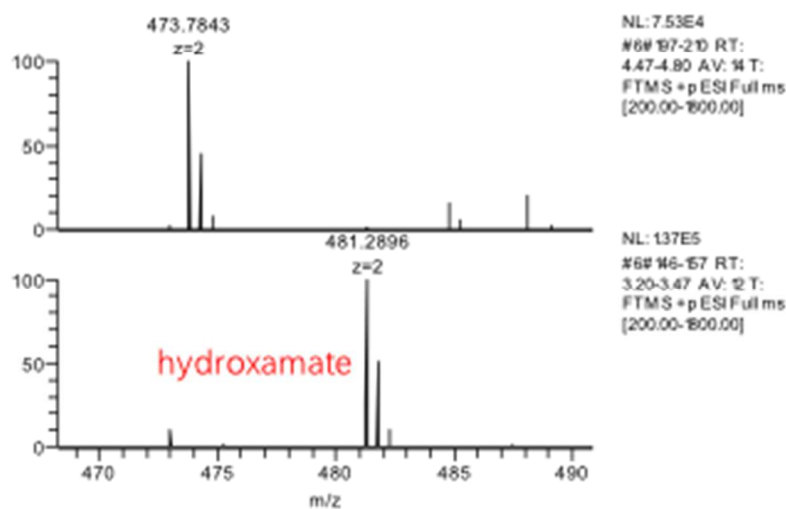



Figure S5.

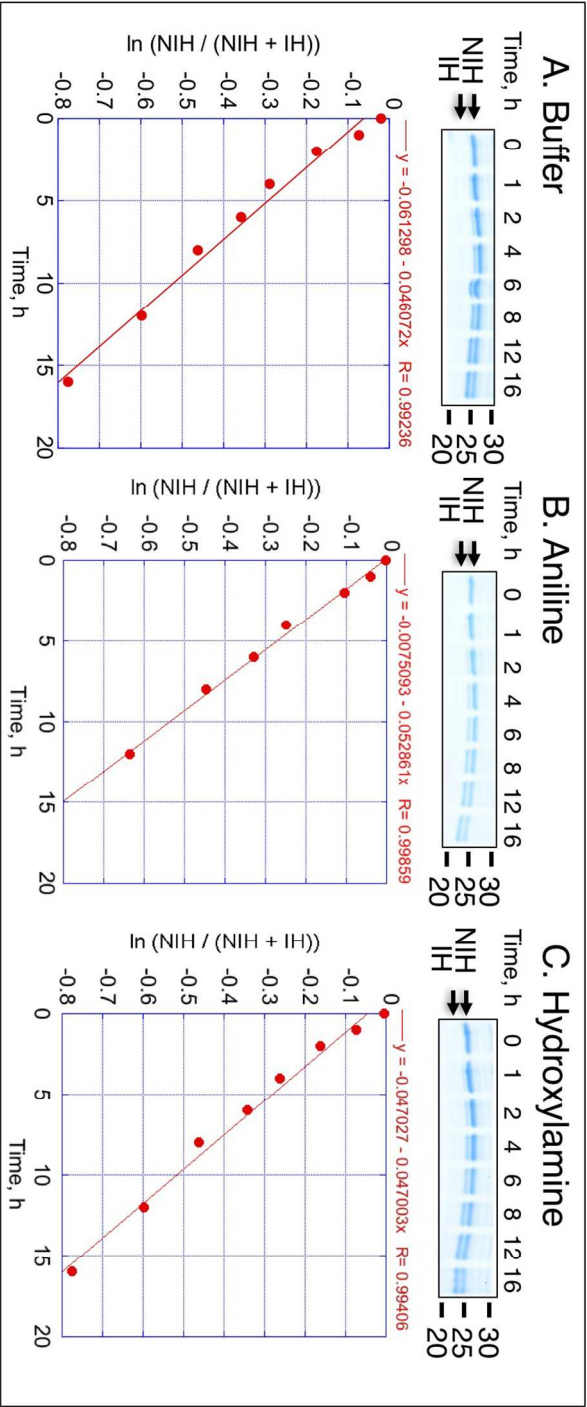

**Table S1. Oligonucleotides used in mutagenesis for this publication (others previously described, including C1A mutation.)**

| <b>Mutation</b> | <b>Oligonucleotides used</b>                                                                                                    |
|-----------------|---------------------------------------------------------------------------------------------------------------------------------|
| T90A            | Upper: 5'-GATGGAAGAAGTTTTGAAACCGCCGTAGATCATCCAGTTTATG<br>Lower: 5'-CTAAAACCTGGATGATCTACGGCGGTTTCAAAAACCTCTTCCATC                |
| H93A            | Upper: 5'-ATGGAAGAAGTTTTGAAACCGCCGTAGATGCTCCAGTTTATGTTATGAAA<br>Lower: 5'-TTTCATAAACTAAAACCTGGAGCATCTACGGTGGTTTCAAAAACCTCTTCCAT |
| T90A/H93A       | Upper: 5'-GGAAGAAGTTTTGAAACCGCCGTAGATGCTCCAGTTTATG<br>Lower: 5'-CTAAAACCTGGAGCATCTACGGCGGTTTCAAAAACCTCTTCC                      |
| C1A/N-1D        | Upper: 5'-CATGCTGCGAAGAGGAGAGAGCGCTTCCCGGGTGATACTAG<br>Lower: 5'-CTAGTATCACCCGGAAGGCGTCTCTCTCTTTCGCAGCATG                       |
| C1A/N-1E        | Upper: 5'-TGAAGCTTAAGAGGAGAGAGCGCTTCCCGG<br>Lower: 5'-CCGGGAAGGCTCTCTCTCTTAAGCTTCA                                              |
| C1A/N-1Q        | Upper: 5'-ATAGCATATGAAGCTTAAGAGGAGACAAGCCTTCCCGGGTG<br>Lower: 5'-CACCCGGAAGGCTTGTCTCTCTTAAGCTTCATATGCTAT                        |

**Table S2. Observed  $m/z$  values for the C-terminal cleavage products of the NIHPab cleavage mutant.**

|   | Components  | $m/z$<br>observed | charge<br>state | Experimental<br>$Mw_{mono}$ | Theoretical<br>$Mw_{mono}$ | Error<br>(ppm) |
|---|-------------|-------------------|-----------------|-----------------------------|----------------------------|----------------|
| A | Asp         | 473.7847          | 2               | 945.5537                    | 945.5542                   | -0.49          |
|   | Anhydride   | 464.7788          | 2               | 927.5419                    | 927.5436                   | -1.79          |
| B | Asp         | 473.7845          | 2               | 945.5533                    | 945.5542                   | -0.91          |
|   | Anhydride   | 464.7795          | 2               | 927.5433                    | 927.5436                   | -0.28          |
|   | Aniline     | 511.3089          | 2               | 1020.6021                   | 1020.6015                  | 0.63           |
| C | Asp         | 473.7843          | 2               | 945.5529                    | 945.5542                   | -1.33          |
|   | Hydroxamate | 481.2896          | 2               | 960.5635                    | 960.5651                   | -1.62          |

## References

- [1] Abramoff, M. D., Magalhaes, P. J., and Ram, S. J. (2004) Image Processing with Image], *Biophotonics International* 11, 36-42.
